1 **Enisamium is an inhibitor of the SARS-CoV-2 RNA polymerase and shows**  
2 **improvement of recovery in COVID-19 patients in an interim analysis of a**  
3 **clinical trial**

4

5 Olha Holubovska<sup>1,11</sup>, Denisa Bojkova<sup>2,11</sup>, Stefano Elli<sup>3,11</sup>, Marco Bechtel<sup>2</sup>, David  
6 Boltz<sup>4</sup>, Miguel Muzzio<sup>4</sup>, Xinjian Peng<sup>4</sup>, Frederico Sala<sup>3</sup>, Cesare Cosentino<sup>3</sup>, Alla  
7 Mironenko<sup>5</sup>, Jens Milde<sup>6</sup>, Yuriy Lebed<sup>7</sup>, Holger Stammer<sup>6</sup>, Andrew Goy<sup>8</sup>, Marco  
8 Guerrini<sup>3</sup>, Lutz Mueller<sup>9\*</sup>, Jindrich Cinatl<sup>2\*</sup>, Victor Margitich<sup>8\*</sup>, and Aartjan J. W. te  
9 Velthuis<sup>10,11\*</sup>

10

11 <sup>1</sup>O.O. Bogomolets National Medical University, T. Shevchenko blvd., 13, Kyiv,  
12 Ukraine

13 <sup>2</sup>Institute of Medical Virology, University Hospital Frankfurt, Goethe University,  
14 Frankfurt am Main, Germany

15 <sup>3</sup>Istituto di Ricerche Chimiche e Biochimiche "G. Ronzoni", Via Giuseppe Colombo  
16 81, 20133 Milano, Italy

17 <sup>4</sup>IIT Research institute, 10 W 35th St, Chicago, IL 60616, United States

18 <sup>5</sup>L.V. Gromashevsky Institute of Epidemiology and Infectious Diseases of the NAMS  
19 of Ukraine, Department of respiratory and other viral infections, Amosova str 5a,  
20 03083, Kyiv, Ukraine

21 <sup>6</sup>Pharmalog Institut für klinische Forschung GmbH, Ismaning, Germany

22 <sup>7</sup>Pharmaxi LLC, Filatova Str., 10A, office 3/20, 01042, Kyiv, Ukraine

23 <sup>8</sup>Farmak Joint Stock Company, Kyrylivska Street, 04080, Kyiv, Ukraine

24 <sup>9</sup>Dr. Regenold GmbH, Zöllinplatz 4, D-79410 Badenweiler, Germany

25 <sup>10</sup>Division of Virology, Department of Pathology, Addenbrooke's Hospital, University  
26 of Cambridge, Hills Road, CB2 2QQ, United Kingdom

27 <sup>11</sup>These authors contributed equally

28

29 \*Corresponding authors. E-mail: [ajwt6@cam.ac.uk](mailto:ajwt6@cam.ac.uk), [cinatl@em.uni-frankfurt.de](mailto:cinatl@em.uni-frankfurt.de),  
30 [lutz.mueller@regenold.com](mailto:lutz.mueller@regenold.com), [v.margitich@farmak.ua](mailto:v.margitich@farmak.ua)

31

32 **Key words:** Covid-19, SARS-CoV-2, molecular dynamics simulation, RNA  
33 polymerase, FAV00A, Amizon

34

35

36 Phase III clinical trial registered at [ClinicalTrials.gov](https://clinicaltrials.gov) under number NCT04682873.

37

38 **Abstract**

39 Pandemic SARS-CoV-2 causes a mild to severe respiratory disease called  
40 Coronavirus Disease 2019 (COVID-19). Control of SARS-CoV-2 spread will depend  
41 on vaccine-induced or naturally acquired protective herd immunity. Until then,  
42 antiviral strategies are needed to manage COVID-19, but approved antiviral  
43 treatments, such as remdesivir, can only be delivered intravenously. Enisamium  
44 (laboratory code FAV00A, trade name Amizon®) is an orally active inhibitor of  
45 influenza A and B viruses in cell culture and clinically approved in countries of the  
46 Commonwealth of Independent States. Here we show that enisamium can inhibit  
47 SARS-CoV-2 infections in NHBE and Caco-2 cells. *In vitro*, the previously identified  
48 enisamium metabolite VR17-04 directly inhibits the activity of the SARS-CoV-2 RNA  
49 polymerase. Docking and molecular dynamics simulations suggest that VR17-04  
50 prevents GTP and UTP incorporation. To confirm enisamium's antiviral properties,  
51 we conducted a double-blind, randomized, placebo-controlled trial in adult,  
52 hospitalized COVID-19 patients, which needed medical care either with or without  
53 supplementary oxygen. Patients received either enisamium (500 mg per dose) or  
54 placebo for 7 days. A pre-planned interim analysis showed in the subgroup of  
55 patients needing supplementary oxygen (n = 77) in the enisamium group a mean  
56 recovery time of 11.1 days, compared to 13.9 days for the placebo group (log-rank  
57 test; p=0.0259). No significant difference was found for all patients (n = 373) or those  
58 only needing medical care (n = 296). These results thus suggest that enisamium is  
59 an inhibitor of SARS-CoV-2 RNA synthesis and that enisamium treatment shortens  
60 the time to recovery for COVID-19 patients needing oxygen.

61

62 **Significance statement**

63 SARS-CoV-2 is the causative agent of COVID-19. Although vaccines are now  
64 becoming available to prevent SARS-CoV-2 spread, the development of antivirals  
65 remains necessary for treating current COVID-19 patients and combating future  
66 coronavirus outbreaks. Here, we report that enisamium, which can be administered  
67 orally, can prevent SARS-CoV-2 replication and that its metabolite VR17-04 can  
68 inhibit the SARS-CoV-2 RNA polymerase *in vitro*. Moreover, we find that COVID-19  
69 patients requiring supplementary oxygen, recover more quickly than patients treated  
70 with a placebo. Enisamium may therefore be an accessible treatment for COVID-19  
71 patients.



## 73 Introduction

74 Severe acute respiratory coronavirus 2 (SARS-CoV-2) is an important human  
75 pathogen and the causative agent of COVID-19. Vaccines are available to prevent  
76 the spread of SARS-CoV-2, and several antiviral strategies, such as treatment with  
77 remdesivir or convalescent plasma, have received emergency approval. However,  
78 the development of additional strategies remains necessary since vaccine roll-out is  
79 slow and current treatments can only be delivered intravenously. A key target for  
80 novel drug screening is the RNA polymerase of SARS-CoV-2 (1-4).

81 SARS-CoV-2 is a betacoronavirus and contains a positive-sense, non-  
82 segmented RNA genome of around 30 kilobases (5, 6). The 5' two-thirds of the viral  
83 genome encode two overlapping open reading frames (ORFs), 1a and 1b, which are  
84 translated into two large polyproteins by host cell ribosomes. The two polyproteins  
85 are cleaved by intrinsic proteolytic activity to produce 16 non-structural proteins  
86 (nsps). Nsp12 is the RNA-dependent RNA polymerase that copies and transcribes  
87 the SARS-CoV-2 genome (7, 8). Nsp12 requires nsp7 and nsp8 for processivity *in*  
88 *vitro* (9) and likely other nsps, such as nsp9 and nsp13, for processivity *in vivo*. The  
89 structures of nsp12/7/8 and nsp8/9/12/13 complexes from SARS-CoV and SARS-  
90 CoV-2 have been solved by cryo-EM (10-12).

91 Remdesivir has been shown to inhibit the SARS-CoV-2 nsp12/7/8 complex  
92 and other nucleoside analogue drugs or small molecule inhibitors have been  
93 suggested as therapeutic candidates (1-3). One of the drugs highlighted by the  
94 World Health Organisation as a candidate therapeutic against SARS-CoV-2 is  
95 enisamium (4-(benzylcarbamoil)-1-methylpyridinium) iodide (laboratory code  
96 FAV00A, marketed as Amizon®; Fig. 1A). Enisamium is licensed for use in 11  
97 countries and a recent study found that enisamium is hydroxylated in humans and  
98 human lung cells to a compound called VR17-04 (Fig. 1A). VR17-04 inhibits the  
99 activity of the influenza virus RNA polymerase and reduces viral shedding and  
100 improves patient recovery in influenza patients (13).

101 In this study, we show that enisamium metabolite VR17-04 inhibits the SARS-  
102 CoV-2 nsp12/7/8 complex *in vitro*, likely by preventing incorporation of GTP and  
103 UTP. We also show that parent compound enisamium inhibits SARS-CoV-2 growth  
104 on Caco-2 and NHBE cells. In patients needing medical care and supplementary  
105 oxygen COVID-19 (Severity Rating 4 [SR 4] of the modified WHO ordinal scale),  
106 enisamium significantly improved the time to recovery compared to a placebo

107 control. These data imply that enisamium is a possible therapeutic option for treating  
108 SARS-CoV-2 infection.

109

## 110 **Results**

### 111 *Enisamium inhibits SARS-CoV-2 infection in cell culture*

112 Previous experiments showed that enisamium (Fig. 1A) can efficiently inhibit  
113 influenza virus replication in normal human bronchial epithelial (NHBE) cultures and  
114 A549 cells, and to a lesser extent in Caco-2 cells (13). Previous experiments have  
115 also demonstrated that enisamium is not cytotoxic to these cells (13). To test if  
116 enisamium can inhibit pandemic SARS-CoV-2 replication in cell culture, we first  
117 incubated Caco-2 cells, a standard cell-line for SARS-CoV-2 infection *in vitro*, with  
118 enisamium iodide or enisamium chloride for 6 hours and subsequently infected the  
119 treated cells with SARS-CoV-2. After 48 hours, inhibition of viral infection was  
120 assessed by antigen staining for viral nucleoprotein expression and RT-qPCR for  
121 viral genome replication. We observed a significant reduction in both viral  
122 nucleoprotein expression (Fig. 1B), a reduction in the cytopathic effect of the SARS-  
123 CoV-2 infection on Caco-2 cells (Fig. 1C), and a 2-log reduction in the number of  
124 viral genome copies in the infected cells as a function of the enisamium  
125 concentration (Fig. S1). The  $IC_{50}$  for enisamium chloride in Caco-2 cells was 1.2 mM  
126 (~300  $\mu$ g/ml), which is comparable to the inhibitory effect of enisamium on influenza  
127 A virus replication in Caco-2 cells (13). To test if enisamium inhibited SARS-CoV-2  
128 replication in NHBE cells, NHBE cells were incubated with enisamium iodide for 6  
129 hours and subsequently infected with SARS-CoV-2. Analysis of the viral RNA levels  
130 in infected NHBE cells revealed an  $IC_{50}$  of 250  $\mu$ g/ml (Fig. 1D). We obtained  
131 comparable results in NHBE cells infected with alpha-coronavirus HCoV NL63 (Fig.  
132 1E), implying that enisamium can inhibit coronavirus replication.

133

### 134 *Enisamium and VR17-04 inhibit SARS-CoV-2 nsp12/7/8 activity*

135 Previous experiments showed that enisamium and VR17-04 can inhibit the influenza  
136 A virus RNA polymerase *in vitro* (13). To determine if enisamium and its putative  
137 metabolite VR17-04 can inhibit the SARS-CoV-2 RNA polymerase, we used a  
138 SARS-CoV-2 RNA polymerase *in vitro* assay that involved nsp12 as the RNA-  
139 dependent RNA polymerase, and nsp7 and nsp8 as processivity factors. We  
140 expressed and purified SARS-CoV-2 nsp7, nsp8 and nsp12, and mixed them at a

141 ratio of 2:2:1 to form a nsp12/7/8 complex. Next, we incubated the nsp12/7/8  
142 complex with a hairpin template (Fig. 1F) in the presence of 0.5 mM of each  
143 nucleotide triphosphate (NTP) and varying concentrations of enisamium or the  
144 previously identified enisamium metabolite VR17-04. Enisamium inhibited nsp12/7/8  
145 activity at relatively high concentrations, with an  $IC_{50}$  of 26.3 mM (Fig. 1G). By  
146 contrast, VR17-04 had an estimated  $IC_{50}$  of 0.98 mM on the hairpin template (Fig.  
147 1G). These  $IC_{50}$  values are within an order of magnitude of those observed for the  
148 inhibition of the influenza virus RNA polymerase (13). Moreover, the  $IC_{50}$  value for  
149 VR17-04 on SARS-CoV-2 nsp12/7/8 is similar to remdesivir triphosphate in the  
150 presence of 0.5 mM NTPs in a comparable assay (14). A 10-fold reduction of the  
151 NTP concentration in the assay lowered the VR17-04  $IC_{50}$  value to 0.029 mM (Fig.  
152 1G), suggesting that VR17-04 is competing with NTP incorporation. Collectively,  
153 these data suggest that RNA synthesis by the SARS-CoV-2 nsp12/7/8 complex is  
154 inhibited by enisamium and its metabolite VR17-04 *in vitro*.

155

#### 156 *Enisamium forms hydrogen bonds with adenine and cytosine in nsp12 and influenza* 157 *polymerase active site*

158 Previous studies (13, 15) and our data in Fig. 1A, suggest that enisamium acts  
159 through metabolite VR17-04 and inhibits the activity of the influenza A virus and  
160 SARS-CoV-2 nsp12 RNA polymerases. However, the mechanism of RNA synthesis  
161 inhibition by VR17-04 is not fully understood. We hypothesised that the additional  
162 OH-group of VR17-04 could support hydrogen bond formation with adenine and  
163 cytosine (Fig. 2A), creating two hydrogen bonds in total, while enisamium would form  
164 only one hydrogen bond with these bases. We expected that VR17-04 would not  
165 form hydrogen bonds with guanine or uridine (Fig. S2), suggesting that the inhibitory  
166 effect of VR17-04 would be dependent on the template sequence.

167 The CO and OH groups of VR17-04 can adopt *trans* and *eclipsed*  
168 conformations that are characterized by three dihedral angles:  $\phi_1$ ,  $\phi_2$  and  $\phi_3$  (Fig. 2B).  
169 Dihedral angles  $\phi_1$  and  $\phi_2$  are also present in enisamium, but  $\phi_3$  involves different  
170 atoms (Fig. S4). In VR17-04, dihedral angle  $\phi_3$  is  $\sim 180^\circ$  in the *trans* conformation  
171 and  $\sim 0^\circ$  in the *eclipsed* conformation (Fig. 2B). Based on quantum chemical  
172 calculations, the *eclipsed* conformation has a lower energy than the *trans*  
173 transformation (Table S1), and only the *eclipsed* conformation would be compatible

174 with cytosine or adenosine binding (Fig. 2B). To confirm that VR17-04 can adopt the  
175 *eclipsed* conformation in solution, we measured the  $^1\text{H}$  NOESY spectrum of VR17-  
176 04 in water and found a correlation between the protons 'HN' and 'H5' that is  
177 compatible with a  $\phi_3$  value of  $0^\circ$  (Fig. 2C). The chemical shifts of the selected  
178 protons are reported in Table S2. Additionally, we observed a correlation between  
179 the HN and the  $\text{CH}_2$ , or the ortho aromatic protons of the Ph group (Fig. 2C). These  
180 observations suggest that VR17-04 can adopt a conformation that would be  
181 compatible with hydrogen bond formation with cytosine and adenine.

182 To further investigate whether VR17-04 can inhibit the activity of the SARS-  
183 CoV nsp12 RNA polymerases through base-pair interactions with the template, we  
184 docked enisamium or VR17-04 into the SARS-CoV-2 nsp12/7/8 complex bound to  
185 template RNA and remdesivir monophosphate (PDB 7bv2, Fig. 2D). Prior to  
186 docking, we removed the remdesivir monophosphate from the complex, and used  
187 *in silico* mutagenesis to change the uridine in the active site to cytosine or adenine.  
188 After selection of the most significant poses, we found that both enisamium and  
189 VR17-04 can be accommodated in the +1 position of the nucleotide binding pocket  
190 (Fig. 2E-G), in a position similar to remdesivir monophosphate (Fig. 2D). VR17-04  
191 was specifically coordinated through hydrogen bond interactions with the unpaired  
192 cytosine residue of the template RNA. Nsp12 residues K545 and K555 were  
193 predicted to preserve the VR17-04 position in the catalytic cavity (Fig. S4). In  
194 addition, our modelling suggests that VR17-04 can form a stacking interaction with  
195 the -1 base of the nascent strand. By contrast, enisamium docked in the same +1  
196 nascent strand position, but only formed one hydrogen bond with the cytosine in the  
197 +1 template position (Fig. S4).

198 To estimate the binding stability of enisamium or VR17-04 in the nsp12 active  
199 site, we performed molecular dynamics (MD) simulations of enisamium or VR17-04  
200 in the nsp12 active site (see Material and Methods for specifics). Our MD simulations  
201 predict that VR17-04 favourably binds the unpaired cytosine in the +1 position of  
202 nsp12/7/8 complex, maintaining two hydrogen bonds (Watson-Crick base pair) as  
203 seen by the preserved hydrogen bonds distances (Fig. 2 E-G) and the coplanarity  
204 angle (Fig. 2H, I). By contrast, our simulations predict that enisamium binds less  
205 stably to the nsp12/7/8 complex, based on the ~2-fold difference in distance between  
206 enisamium and cytosine compared to VR17-04 and cytosine (Fig. 2E, F; Table S3),



207 and a higher estimated Poisson-Boltzmann free energy for the enisamium binding  
208 (43.6 kcal/mol) compared to VR17-04 binding to either cytosine (-19.8 kcal/mol) or  
209 adenine (-14.8 kcal/mol) (Table S4).

210 To investigate if VR17-04 inhibits the SARS-CoV nsp12/7/8 RNA polymerase  
211 complex in a sequence-specific manner, we analysed the extension of a hairpin  
212 template containing a cytosine or adenine in the +1 position of the template (Fig. 2J)  
213 in the presence or absence of VR17-04. We found that at high VR17-04  
214 concentrations, the nsp12/7/8 RNA polymerase complex was prevented from  
215 incorporating GTP and UTP (Fig. 2J). When we subsequently moved the cytosine  
216 residue to the +2 nt position of the template down and introduced a uridine at the +1  
217 position, ATP was incorporated in the presence of VR17-04 but GTP was not (Fig.  
218 2K), suggesting that the inhibitory activity of VR17-04 is dependent on the sequence  
219 of the template.

220

### 221 *Enisamium Improves COVID-19 Patient Recovery in Interim Analysis of Clinical Trial*

222 To investigate if enisamium affects the clinical course of COVID-19 patients, a  
223 double-blind, randomized, placebo-controlled phase III clinical study was performed.  
224 The COVID-19 diagnosis was based on a body temperature of  $\geq 37.8$  °C and  
225 laboratory confirmed presence of SARS-CoV-2 RNA by RT-PCR in pharyngeal  
226 swabs or sputum. The patient cohorts required either medical care but no  
227 supplementary oxygen (Severity Rating (SR) 5; WHO score 3), or medical care and  
228 supplementary oxygen (SR 4; WHO score 4) on the day of enrolment and  
229 randomization. Randomized COVID-19 patients were treated with either placebo  
230 (group A) or enisamium chloride (group B) for 7 days. The chosen primary endpoint  
231 of the trial was time-to-recovery, and recovery was defined as an improvement in the  
232 SR baseline status by 2 SR score values (e.g., a change from SR 4 to SR 6).

233 In accordance with the study protocol, an interim analysis on all patients in the  
234 Intent-to-Treat evaluation set (ITT) was performed for the primary endpoint by an  
235 Independent Data Monitoring Committee (IDMC) using a pre-defined Charter. The  
236 ITT set for interim analysis included 373 patients of which 296 patients had SR 5 and  
237 77 patients had SR 4 on day of randomization (Fig. 3A). The interim analysis showed  
238 no difference in time-to-recovery and median time-to-recovery between all placebo-  
239 and enisamium-treated ITT patients (Fig. 3B) nor in the subgroup of patients with SR  
240 5 (Fig 3C). In contrast, analysis of the SR 4 subgroup alone (n = 77) revealed a



241 faster time-to-recovery with the enisamium-treated patients compared to the  
242 placebo-treated for the whole period of recovery, starting 7 days after randomization  
243 (Fig. 3D). The estimated median time-to-recovery was 13 days for the placebo-  
244 treated patients and 11 days for the enisamium-treated patients. The mean time-to-  
245 recovery was 13.9 days for the placebo-treated group and 11.1 days for the  
246 enisamium-treated group. The log-rank test showed a significant advantage in  
247 recovery time in favour of enisamium treatment at interim stage ( $P = 0.0259$ ). The  
248 maximum time-to-recovery was reached on day 21 for the enisamium-treated group.  
249 Not all patients recovered in the placebo-treated group. For these patients, the  
250 recovery time was displayed as 29 days (Fig. 3D).

251 Based on the above findings, the IDMC recommended to stop recruitment of  
252 patients requiring only medical care but no oxygen (SR 5; WHO score 3) and to  
253 continue the study with COVID-19 patients requiring supplementary oxygen in  
254 addition to standard medical care (SR 4; WHO score 4).

255

256

## 257 Discussion

258 The rapid global spread of SARS-CoV-2 necessitates development of effective  
259 therapeutic interventions, and the most promising short-term strategy is to repurpose  
260 existing drugs. In this study we showed that enisamium, which is approved for use  
261 against influenza in 11 countries, can inhibit SARS-CoV-2 RNA synthesis (Fig. 1).  
262 Moreover, we showed that enisamium and its metabolite, VR17-04, inhibit the RNA  
263 synthesis activity of the SARS-CoV-2 nsp12/7/8 complex (Fig. 1, 2). Molecular  
264 dynamics analysis and *in vitro* activity assays suggest that VR17-04 prevents GTP  
265 and UTP incorporation into the nascent RNA chain (2).

266 It was previously reported that enisamium inhibits the influenza A virus RNA  
267 polymerase activity *in vitro* with a relatively high  $IC_{50}$  value of 46.3 mM (13). This  
268 inhibition was improved 55-fold by addition of a hydroxyl group in the compound  
269 VR17-04 (13). We find that SARS-CoV-2 nsp12/7/8 complex activity is inhibited by  
270 enisamium and VR17-04 with similar  $IC_{50}$  values to the influenza A virus RNA  
271 polymerase at similar NTP levels (Fig. 1) (13). Furthermore, the  $IC_{50}$  value for VR17-  
272 04 is similar to remdesivir triphosphate in a similar *in vitro* assay used (14).  
273 Remdesivir triphosphate is the active metabolite of remdesivir, which has shown

274 promise in both cell culture and clinical trials as a treatment for SARS-CoV-2  
275 infection (16).

276 Our docking and molecular dynamics simulations suggest that VR17-04 can  
277 bind a template cytosine or adenine base in the active site of the SARS-CoV-2 RNA  
278 polymerase. This hypothesis is supported by our NOE experiments performed in  
279 water, which indicate that VR17-04 can adopt an *eclipsed* conformation in solution.  
280 Only the *eclipsed* conformation is compatible with the sequence-specific inhibition  
281 we observed in our *in vitro* polymerase reactions. We cannot fully exclude the  
282 possibility that VR17-04 can also bind bases in the nascent RNA strand. However,  
283 we think that this alternative explanation does not adequately explain our data.

284 We observed that the inhibitory effect of enisamium was more pronounced in  
285 NHBE cells than in Caco-2 cells, which is in line with previous influenza A virus  
286 experiments (13, 15) and suggest that enisamium is more readily metabolised into  
287 VR17-04 in primary bronchial epithelial cells compared to adenocarcinoma cells.  
288 Interestingly, the interim phase III clinical trial results that we disclose here reveal a  
289 faster improved recovery in COVID-19 patients needing supplementary oxygen,  
290 strongly suggesting that our *in vitro* data are well-aligned with the data from the  
291 clinical trial. We cannot exclude that enisamium or its metabolite has effects beyond  
292 RNA polymerase inhibition and that these additional effects contribute to the COVID-  
293 19 patient recovery.

294 Overall, our results strongly suggest that enisamium metabolite VR17-04  
295 inhibits RNA synthesis by the SARS-CoV-2 nsp12/7/8 complex. Together with the  
296 interim phase III clinical trial findings that enisamium improved the recovery of  
297 COVID-19 needing supplementary oxygen (SR 4) by more than 2 days, our  
298 observations raise the possibility that enisamium could be used a viable therapeutic  
299 option against SARS-CoV-2 infection. Moreover, unlike remdesivir, enisamium does  
300 not require intravenous administration, which would be advantages for its use  
301 outside of a hospital setting. Together with observations that enisamium can inhibit  
302 other RNA virus infections, and DNA virus infections (13, 15, 17), these results here  
303 suggest that it can act as broad-spectrum polymerase inhibitor.

304

305

## 306 **Materials and Methods**

### 307 ***SARS-CoV-2 infections***

308 Confluent layers of Caco-2 cells in 96-well plates were treated with serial dilutions of  
309 FAV00A or FAV00B 6 hours prior to infection. The cells were infected with SARS-  
310 CoV-2 at multiplicity of infection 0.01 for 1 h, and compound reapplied following virus  
311 removal. At 48h post infection, the cytopathic effect was recorded by examination of  
312 infected cultures by light microscopy and supernatant collected to quantify virus RNA  
313 by RT-qPCR as described previously, using nsp12-specific primers 5'-  
314 GTGARATGGTCATGTGTGGCGG-3' and 5'-  
315 CARATGTTAAASACACTATTAGCATA-3' (18-20). Cells were fixed with  
316 acetone/methanol (40:60) and immunostained using a SARS-CoV-2 nucleoprotein  
317 monoclonal antibody (1:500, Sinobiological, Cat #40143-R019-100ul). Staining was  
318 detected using a peroxidase conjugated anti-rabbit secondary antibody (1:1000,  
319 Dianova) and the addition of AEC substrate.

320

### 321 ***HCoV-NL63 NHBE infections***

322 MatTek's EpiAirway System (MatTek; Ashland, MA) consisted of differentiated  
323 NHBE cells that were cultured to form a multilayered, highly differentiated model that  
324 closely resembles the epithelial tissue of the respiratory tract. The cells from a single  
325 donor (No. 9831) were used for assay consistency. The apical surface of the cells  
326 was exposed to a humidified 95% air/ 5% CO<sub>2</sub> environment. The basolateral  
327 medium was changed, and the mucin layer was washed every 24-48 hours. NHBE  
328 cells were inoculated via the exposure of the apical side to HCoV-NL63. After 1 hour  
329 of incubation with virus in a water-jacketed 37°C incubator with a 5% CO<sub>2</sub> supply,  
330 the viral inoculum was removed from the cells. The apical side of the cells was  
331 washed once prior to infection. After viral inoculation, enisamium chloride or control  
332 media were added to the apical side of the cells and the basal media compartment  
333 and incubated with the cells for 1 hour. After a 1-hour incubation, the drug containing  
334 media was removed from apical and basal chambers. Growth medium alone or  
335 growth medium with enisamium chloride were added to the bottom chamber, and  
336 cells were incubated for 48 hours. At the termination of the experiments, cells were  
337 washed twice, then 1 ml Trizol (Invitrogen) was added to each well for RNA isolation.  
338 Total RNA was isolated from cells using Trizol per the manufacturer's instruction.  
339 Two-step RT-qPCR was performed using HCoV-NL63 N gene-specific primers/probe  
340 (forward primer: 5'-TGGTGTTGTTTGGGTTGCTA-3', reverse primer 5'-  
341 GCTCTGGAGGCAAAGCAATA-3', double-quenched probe: 5'-

342 FAM/CGCAAACGT/ZEN/AATCAGAAACCTTTGGA/IABKFQ-3'), GAPDH was analysed  
343 at the same time with GAPDH-specific primers (5'- GTTCGACAGTCAGCCGCATC-  
344 3' and 5'- AGTTAAAAGCAGCCCTGGTGA-3') by RT-qPCR and served as a  
345 reference gene for normalization.

346

#### 347 ***SARS-CoV-2 nsp12/7/8 in vitro activity assays***

348 Plasmids expressing nsp7, nsp8 and nsp12 were kindly provided by Dr Ervin Fodor  
349 (University of Oxford). Nsp7, nsp8 and nsp12 were purified as described previously  
350 (14) and mixed at a molar ratio of 2:2:1 to form active nsp12/7/8 complex. For activity  
351 assays, 50 nM hairpin template (5'-  
352 CGUAGGAGAAUGACAAAUUUUGUCAUUCUCC-3'), or a variation of this  
353 template (see figures), was incubated with 1  $\mu$ M nsp12/7/8 complex for 30 mins at 30  
354  $^{\circ}$ C, in reaction buffer containing 5 mM  $MgCl_2$ , 20 mM HEPES pH 8.0, 0.5 mM ATP,  
355 0.5 mM UTP, 0.5 mM GTP, 0.5 mM CTP, 0.05% NP-40, 5% glycerol, 50 mM NaCl, 1  
356 U RNasin (Promega) and 1 mM DTT. Hairpin templates were based on the 3'  
357 terminal sequence of the SARS-CoV-2 genome and reference (3). Reactions were  
358 stopped by addition of 80% formamide and 10 mM EDTA, followed by heating to 95  
359  $^{\circ}$ C for 3 min. Reaction products were resolved by 20 % denaturing PAGE with 7M  
360 urea, and visualised by phosphorimaging on a Typhoon FLA 7000 (GE Healthcare)  
361 scanner. Data were analysed using ImageJ and Prism 9 (GraphPad). Enisamium  
362 iodide (Farmak) or VR17-04 (Farmak) were dissolved in DMSO to a stock  
363 concentration of 250 and 125 mg/ml, respectively. Dilutions were made in DMSO.

364

#### 365 ***NOE NMR spectra measurement***

366 The VR17-04 (2 mg) was dissolved in 0.6 ml D<sub>2</sub>O/water solution (5% D<sub>2</sub>O). NMR  
367 experiments were performed at 500MHz at 277 K. For NOESY experiments  
368 (noesygpph) 128 transients were collected for each free-induction decay, using a  
369 mixing time of 300 ms and 20 sec of relaxation delay. NOESY experiment (matrix  
370 1024 · 320 points) was zero-filled to 2K · 2K before Fourier transformation.  
371 Measurements were taken on a Bruker 500 HD NMR spectrometer equipped with a  
372 5 mm BB probe.

373

#### 374 ***Conformational characterization and geometry optimization***

375 The VR17-04 and enisamium conformational characterization and geometry  
376 optimization was done using the quantum chemical approach DFT B3LYP/6-31G\*.  
377 The lowest energy conformation of VR17-04 ( $\phi_3$  eclipsed) and enisamium were  
378 selected for further docking and for partial charge estimation (Table S1).

379

### 380 **Molecular docking**

381 The docking simulation was performed using Autodock 4.2 software (21). The  
382 geometry of the ligands was previously optimized by DFT B3LYP/6-31G\*. The  
383 geometry of the receptor RdRp was extracted from the PDB 7bv2 (22). The catalytic  
384 site of the nsp12/7/8 complex include the template RNA strand, the nascent strand  
385 RNA, the pyrophosphate moiety  $[O_3P-O-PO_3]^{-4}$  (pyr) and two  $Mg^{+2}$  ions, whose  
386 positions were included in 7BV2. The two  $Zn^{+2}$  ions that were co-crystallized in 7BV2  
387 were also included in the models. The co-crystallized inhibitor remdesivir was  
388 removed from the complex, while its position and the contacts with the template RNA  
389 through the unpaired uracil base in the +1 position were used to guide the molecular  
390 docking. The unpaired uracil base was subsequently mutated in cytosine (Cyt) or  
391 adenine (Ade) in Pymol 2.3.4 (Schrodinger LLC), generating two different  
392 complexes, identified as nsp12/7/8(Cyt) and nsp12/7/8(Ade) respectively. Next,  
393 Gasteiger charges were calculated for both ligands (VR17-04, enisamium) and the  
394 receptor complexes, and used as parameters of the docking simulation (23). In the  
395 docking simulation VR17-04 and enisamium were described by five and four  
396 rotational degrees of freedom, respectively. The docking gridbox was built by  
397 orthogonal hedges of length between 60 to 80 points. The gridbox centre was set to  
398 the  $NH_2^-$  group of the target cytosine or adenine residues of the template RNA  
399 strand, respectively, and further set-up to fit the space between the R555 and K545,  
400 and the uracil of the nascent RNA strand. The docking runs used the default Genetic  
401 Algorithm search, with parameters: number of GA runs, population size, max number  
402 of energy evaluation, and max number of generations set as 100, 2000,  $2.5 \cdot 10^7$ ,  
403 270.000. At each run the docking solutions were clustered using a tolerance RMSD  
404 = 2.0 Å. Three different docking simulations were run: VR17-04 and enisamium were  
405 docked on to nsp12/7/8(Cyt), while, for comparison, VR17-04 was further docked on  
406 nsp12/7/8(Ade). The docking solutions were selected based on two criteria. The first  
407 criterium was the possibility to form a Watson-Crick base-pair interaction between

408 VR17-04 (or enisamium) and the unpaired cytosine or adenine. The second criterium  
409 was based on the possibility to figure out interferences of the ligand with the catalytic  
410 mechanism, for example by interaction with key residues of the nsp12/7/8 complex.  
411 The selected poses were further ranked by preliminary MD simulation (approximately  
412 20 ns) in explicit solvent, to predict the stability of the interaction, and to estimate the  
413 Poisson-Boltzmann free energy of binding, this last property was used to obtain a  
414 final selection and ranking of the poses.

415

### 416 ***Molecular dynamic simulation***

417 Explicit solvent MD simulation were run using NAMD 2.12 (24) software, applying the  
418 Amber force field (ff14SB) (25). The TIP3P (26) water solvent model was used. The  
419 t-leap application of the Ambertools 14.0 package (25) was applied to generate the  
420 topology, the parameters, and the coordinate files of the macromolecular complex  
421 simulated. The coordinates of the macromolecular elements of the nsp12/7/8  
422 complex: nsp12, nsp8, nsp7, pyr, template RNA, nascent strand RNA, were  
423 extracted from the PDB 7bv2. The geometries of the VR17-04, enisamium (before  
424 docking) and pyr were optimized using the quantum chemical approach DFT  
425 B3LYP/6-31G\*; the corresponding partial charges were estimated fitting the  
426 electrostatic potential that was calculated at level of theory B3LYP/6-31G\*/RHF/6-  
427 31G\*. This procedure is in accord to the standard required by the Amber force field.  
428 The quantum chemistry software GAMESS (27) was used for this stage. The Amber  
429 atomtypes (parm10.dat) were selected for VR17-04, enisamium and pyr  
430 (antechamber application, Ambertools 14.0). Three macromolecular complexes  
431 indicated as VR1704-nsp12/7/8(Cyt), enisamium-nsp12/7/8(Cyt), and VR1704-  
432 nsp12/7/8(Ade), were solvated by a 15 Å wide layer of TIP3P water molecules in  
433 each X, Y, Z direction; the orthogonal simulation box was built with hedges of  
434 approximate length 116, 116, 127 Å. The non-bond electrostatic and dispersive  
435 interactions were described by the standard cut-off technique (12.0 Å). Before  
436 running MD simulation, each simulation cell box was energy minimized running 200  
437 K steps of the default energy minimized algorithm, as implemented in NAMD. The  
438 MD simulations were run fixing the number of particle (N), the absolute temperature  
439 (T), and the pressure (P) applied to the cell hedges. The absolute temperature was  
440 300 K and maintained with a Lowe–Andersen thermostat, while the pressure on the  
441 cell box hedges was set as  $P = 1.01325$  bar and preserved by the Nosé–Hoover–



442 Langevin piston algorithm. The first MD simulation stage was run to adjust the  
443 simulation cell box density, allowing the relaxation of all the inter-molecule distances,  
444 i.e., the solute-solute, solute-solvent, and solvent-solvent distances. The cell density  
445 equilibration stage was run restraining the atoms of the solute to their initial position  
446 (energy minimized geometry of the complex) applying a harmonic restraint. In this  
447 stage of cell density equilibration, the water molecules were left free to move. The  
448 harmonic restraint constant value was set initially as 1 Kcal mol<sup>-1</sup> for each atom of  
449 the solute, and progressively reduced at 0.5 and 0.2 Kcal mol<sup>-1</sup>. The cell density  
450 equilibration stage was monitored plotting the cell volume (Å<sup>3</sup>) vs time (ns), until the  
451 cell volume fluctuations level-off to a horizontal axis that corresponds to the average  
452 final volume of the cell. This stage required between 20 to 50 ns approximately and  
453 was further checked by the formation of a thin water shell that surround the face of  
454 the inhibitor molecule that is exposed to the empty catalytic cavity of the nsp12/7/8  
455 complex. In the second stage of the MD simulation, the harmonic restraint was  
456 removed, and the inhibitor-nsp12/7/8 complex was allowed to equilibrate in the  
457 geometry and the relative position of their elements: inhibitor, template RNA, nascent  
458 strand RNA, pyr, Mg<sup>+2</sup>, and Zn<sup>+2</sup>. To monitor the equilibration of position and  
459 orientation that VR17-04 (or enisamium) presents in the +1 position of the catalytic  
460 cavity, the distances between the carbonyl oxygen of VR17-04 and the hydrogen  
461 (NH<sub>2</sub>-) of cytosine (or adenine), and between the hydroxyl group of VR17-04 and the  
462 nearby lone pair of cytosine nitrogen (or adenine), were plotted vs simulation time.  
463 These distances provide a direct indication of the stability of the Watson-Crick base  
464 pair interaction that hold the inhibitor and the target base. The orientation of the  
465 VR17-04 in the catalytic site of the nsp12 were also monitored by the improper  
466 dihedral angle  $\phi$  defined by the following atoms (bold) **CO-NH<sub>2</sub>-N-OH**, in which **CO**  
467 and **OH** belong to VR17-04, while the remaining **NH<sub>2</sub>** and **N** belong to the opposite  
468 cytosine (or adenine). Alternatively, the enisamium-cytosine pair require the following  
469 atoms **CO-NH<sub>2</sub>-N-CH** to define  $\phi$ , in this case **CO** and **CH** belong to enisamium,  
470 while **NH<sub>2</sub>** and **N** belong to the opposite cytosine. In fact, values of this angle around  
471 '0' indicate that the 'base pair' contact between VR1704 the cytosine (or adenine) is  
472 coplanar, a geometric condition favouring the Watson-Crick 'base-pair' interaction  
473 between VR17-04 and the base. VMD 1.9.3 (28) was used for the MD simulation  
474 trajectory visualization and image creation.



475

### 476 **Estimation of Poisson-Boltzmann free energy of binding**

477 In a system that evolve in accord to the complex formation reaction (29).

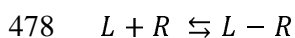

479 **(eq. 1)**

480 The free energy change is calculated knowing only the initial and final state of the  
481 system:

$$482 \quad \Delta G^{Bind} = G(L - R) - G(L) - G(R)$$

483 **(eq. 2)**

484 The free energy decomposed in the following terms:

$$485 \quad G = \langle E_{MM} \rangle + \langle G_{sol} \rangle + \langle G_{noPol} \rangle - T \langle S_{MM} \rangle \quad \text{(eq. 3)}$$

486 The free energy change is then conveniently split:

$$487 \quad \Delta G^{Bind} = \Delta G_{PB}^{Bind} + \Delta S_{MM} \quad \text{(eq. 4)}$$

488 In **eq. 3** the  $E_{MM}$  correspond to the potential energy of the system, as described by  
489 the force-field;  $G_{sol}$  is the polar solvation energy, estimated by the Poisson-  
490 Boltzmann equation (30);  $G_{noPol}$  is the non-polar solvation energy, estimated by the  
491 solvent-accessible surface area, a method included in the MMPBSA.  $T$  is the  
492 absolute equilibrium temperature, while  $S_{MM}$  is the molecular entropy of the system.  
493 The sum of the first three terms on the right-hand side of the **eq. 3** is conveniently  
494 defined Poisson-Boltzmann free energy of binding  $\Delta G_{PB}^{Bind}$  (see **eq. 4**). To estimate  
495 the absolute value of the free energy of binding  $\Delta G^{Bind}$  the molecular entropy change  
496  $\Delta S_{MM}$  is required. Since in this study two similar molecules: VR17-04 and enisamium  
497 were compared as bound to cytosine (+1 position of the catalytic site of nsp12), or  
498 alternatively two bound states VR17-04-cytosine or VR17-04-adenine were inquired,  
499 in a level zero approximation the respective entropy changes  $\Delta S_{MM}$  are considered  
500 similar. In this condition the Poisson-Boltzmann free energy of binding  $\Delta G_{PB}^{Bind}$  could  
501 be used to rank the selected molecular recognitions and/or the poses of the docking  
502 experiment.

503

### 504 **Patients**

505 For this prospective, multi-centre, randomized, double-blind, placebo-controlled,  
506 parallel-group phase III clinical trial, male and female hospitalized patients  $\geq 18$   
507 years with moderate severity of COVID-19 infection were eligible for participation.

508 The diagnosis of COVID-19 was based on body temperatures of  $\geq 37.8$  °C and  
509 laboratory confirmed RT-PCR SARS-CoV-2 test from pharyngeal swabs or sputum.  
510 According to intent-to-treat (ITT) definition and the actual recruitment status, 373  
511 patients from 15 Ukrainian hospitals could be included into the interim analysis.

512 The study was conducted in accordance with the Declaration of Helsinki, ICH-  
513 GCP and the national laws and regulations in Ukraine. All patients signed an  
514 informed consent prior to study participation. The study was approved by the Ethics  
515 Commission of the Regional Clinical Hospital of Ivano-Frankivsk Regional Council on  
516 12.05.2020. The registration number of the study in ClinicalTrials.gov is  
517 NCT04682873.

518

### 519 ***Treatment***

520 Patients were randomized at a 1:1 ratio to receive either 500 mg enisamium chloride  
521 or matching placebo 4 times daily every 6 h for 7 full days. Supporting treatment  
522 could be given at the investigator's discretion. All patients treated with either placebo  
523 or enisamium, having a laboratory-confirmed SARS-CoV-2 at randomization and  
524 providing any valid efficacy data after initiation of treatment were included in the  
525 Intent-to-Treat evaluation set (ITT).

526

### 527 ***Data Collection***

528 Baseline clinical data of the patients were recorded in the electronic case report  
529 forms including demographics, medical history, previous and ongoing medication,  
530 body height and weight and results of physical examination. During the study up to  
531 day 29 or until discharge, symptom severity rating, vital signs, assessment of  
532 COVID-19 symptoms, safety lab results, concomitant medication and adverse events  
533 were recorded. The patient's and investigator's judgment on safety and efficacy were  
534 collected independently. RT-PCR tests on SARS-CoV-2 at defined intervals and at  
535 the discretion of the investigator were carried out.

536

### 537 ***Primary Outcome***

538 The primary outcome was measured as the time from the day of randomization (day  
539 1) to an improvement of at least two score points (from the status at randomization)  
540 on the severity rating (SR) scale in days. The SR scale (WHO scale) is defined as 1  
541 (8) - Death; 2 (7, 6) - Hospitalized, on invasive mechanical ventilation or

542 extracorporeal membrane oxygenation; 3 (5) - Hospitalized, on non-invasive  
543 ventilation or high flow oxygen; 4 (5) - Hospitalized, requiring supplemental oxygen;  
544 5 (3) - Hospitalized, not requiring supplemental oxygen – requiring ongoing medical  
545 care; 6 (-) - Hospitalized, not requiring supplemental oxygen – no longer requires  
546 ongoing medical care; 7 (2) - Not hospitalized, limitation on activities and/or requiring  
547 home oxygen; 8 (1) - Not hospitalized, no limitations on activities. Safety of  
548 enisamium iodide will be analysed based on the incidence of adverse events, vital  
549 signs, judgement of global tolerability on day of hospital discharge (separately by  
550 patient and investigator) and laboratory data when the study is completed.

551

### 552 ***Statistical Analysis of Interim Data.***

553 The unblinded interim analysis was carried out by an Independent Data Monitoring  
554 Committee based on a pre-specified Charter. At this stage, the primary outcome was  
555 pre-planned to be tested by using the two-sided log-rank test stratified by centre.  
556 Because of the low patient number in some centres the stratification was omitted for  
557 gaining primary interim results. The primary outcome was defined as an  
558 improvement from baseline of at least two SR points and was evaluated for all ITT  
559 patients at the interim stage as well as for subgroups with baseline score of SR 4  
560 and 5 separately. The interim analysis used the promising zone approach according  
561 to (31) that was implemented according to (32). For this method no adjustment of the  
562 type-I error rate is needed.

563

### 564 **Acknowledgments**

565 The authors would like to thank Dr. Juergen Richt (Kansas State University,  
566 Manhattan, KS, US) for comments and advice, and Dr Ervin Fodor, Dr Jonathan  
567 Grimes, Alexander Walker, Dr Haitian Fan and Dr Jeremy Keown (University of  
568 Oxford, Oxford, UK) for expression constructs and sharing preliminary data.

569

### 570 **Funding**

571 A.J.W.t.V is supported by joint Wellcome Trust and Royal Society grant  
572 206579/Z/17/Z and the National Institutes of Health grant R21AI147172. Part of this  
573 research was funded by Farmak Public Joint Stock Company, Kiev, Ukraine.

574

### 575 **Conflict of interest**

576 V.M. and A.G. are employees of Farmak Public Joint Stock Company, Kiev, Ukraine.  
577 Part of this research was funded by Farmak Public Joint Stock Company, Kiev,  
578 Ukraine.

579  
580

## 581 References

- 582 1. T. P. Sheahan *et al.*, An orally bioavailable broad-spectrum antiviral inhibits SARS-CoV-2 in  
583 human airway epithelial cell cultures and multiple coronaviruses in mice. *Sci Transl Med*  
584 10.1126/scitranslmed.abb5883 (2020).
- 585 2. R. M. Cox, J. D. Wolf, R. K. Plemper, Therapeutically administered ribonucleoside analogue  
586 MK-4482/EIDD-2801 blocks SARS-CoV-2 transmission in ferrets. *Nat Microbiol*  
587 10.1038/s41564-020-00835-2 (2020).
- 588 3. A. Shannon *et al.*, Rapid incorporation of Favipiravir by the fast and permissive viral RNA  
589 polymerase complex results in SARS-CoV-2 lethal mutagenesis. *Nat Commun* **11**, 4682  
590 (2020).
- 591 4. D. H. Goldhill *et al.*, The mechanism of resistance to favipiravir in influenza. *Proc Natl Acad*  
592 *Sci U S A* **115**, 11613-11618 (2018).
- 593 5. E. Hartenian *et al.*, The molecular virology of coronaviruses. *J Biol Chem* **295**, 12910-12934  
594 (2020).
- 595 6. V. Coronaviridae Study Group of the International Committee on Taxonomy of, The species  
596 Severe acute respiratory syndrome-related coronavirus: classifying 2019-nCoV and naming it  
597 SARS-CoV-2. *Nat Microbiol* **5**, 536-544 (2020).
- 598 7. L. Subissi *et al.*, SARS-CoV ORF1b-encoded nonstructural proteins 12-16: replicative enzymes  
599 as antiviral targets. *Antiviral Res* **101**, 122-130 (2014).
- 600 8. A. J. te Velhuis, J. J. Arnold, C. E. Cameron, S. H. van den Worm, E. J. Snijder, The RNA  
601 polymerase activity of SARS-coronavirus nsp12 is primer dependent. *Nucleic Acids Res* **38**,  
602 203-214 (2010).
- 603 9. L. Subissi *et al.*, One severe acute respiratory syndrome coronavirus protein complex  
604 integrates processive RNA polymerase and exonuclease activities. *Proc Natl Acad Sci U S A*  
605 **111**, E3900-3909 (2014).
- 606 10. L. Yan *et al.*, Architecture of a SARS-CoV-2 mini replication and transcription complex. *Nat*  
607 *Commun* **11**, 5874 (2020).
- 608 11. H. S. Hillen *et al.*, Structure of replicating SARS-CoV-2 polymerase. *Nature* **584**, 154-156  
609 (2020).
- 610 12. J. Chen *et al.*, Structural Basis for Helicase-Polymerase Coupling in the SARS-CoV-2  
611 Replication-Transcription Complex. *Cell* **182**, 1560-1573 e1513 (2020).
- 612 13. T. G. Zubkova *et al.*, Enisamium reduces influenza virus shedding and improves patient  
613 recovery by inhibiting viral RNA polymerase activity. *MedRxiv* (2020).
- 614 14. A. P. Walker *et al.*, Enisamium is a small molecule inhibitor of the influenza A virus and SARS-  
615 CoV-2 RNA polymerases. *bioRxiv* 10.1101/2020.04.21.053017 (2020).
- 616 15. D. Boltz *et al.*, Activity of enisamium, an isonicotinic acid derivative, against influenza viruses  
617 in differentiated normal human bronchial epithelial cells. *Antivir Chem Chemother* **26**,  
618 2040206618811416 (2018).
- 619 16. J. H. Beigel *et al.*, Remdesivir for the Treatment of Covid-19 - Final Report. *N Engl J Med* **383**,  
620 1813-1826 (2020).
- 621 17. V. V. Zurbaev, A. V. Slita, E. O. Sinegubova, A. A. Muryleva, I. N. Lavrentieva, Anti-viral  
622 activity of enisamium iodide against viruses of influenza and ARVI's on different cell lines.  
623 *Therapeutic Archive* **92**, 45-50 (2020).
- 624 18. D. Bojkova *et al.*, Proteomics of SARS-CoV-2-infected host cells reveals therapy targets.  
625 *Nature* **583**, 469-472 (2020).
- 626 19. D. Bojkova *et al.*, Aprotinin Inhibits SARS-CoV-2 Replication. *Cells* **9** (2020).

- 627 20. T. Toptan *et al.*, Optimized qRT-PCR Approach for the Detection of Intra- and Extra-Cellular  
628 SARS-CoV-2 RNAs. *Int J Mol Sci* **21** (2020).
- 629 21. G. M. Morris *et al.*, AutoDock4 and AutoDockTools4: Automated docking with selective  
630 receptor flexibility. *J Comput Chem* **30**, 2785-2791 (2009).
- 631 22. W. Yin *et al.*, Structural basis for inhibition of the RNA-dependent RNA polymerase from  
632 SARS-CoV-2 by remdesivir. *Science* **368**, 1499-1504 (2020).
- 633 23. J. Gesteiger, M. Marsili, Iterative partial equalization of orbital electronegativity a rapid  
634 access to atomic charges. *Tetrahedron* **36**, 3219-3228 (1980).
- 635 24. J. C. Phillips *et al.*, Scalable molecular dynamics with NAMD. *J Comput Chem* **26**, 1781-1802  
636 (2005).
- 637 25. D. A. Case *et al.*, The Amber biomolecular simulation programs. *J Comput Chem* **26**, 1668-  
638 1688 (2005).
- 639 26. W. L. Jorgensen, J. Chandrasekhar, J. D. Madura, R. W. Impey, M. L. Klein, Comparison of  
640 simple potential functions for simulating liquid water *J. Chem. Phys.* **79**, 926-935 (1983).
- 641 27. M. W. Schmidt *et al.*, General Atomic and Molecular Electronic Structure System. *J. Comput.*  
642 *Chem.* **14**, 1347-1363 (1993).
- 643 28. W. Humphrey, A. Dalke, K. Schulten, VMD: visual molecular dynamics. *J. Mol. Graphics* **14**,  
644 27-38 (1996).
- 645 29. A. Weis, K. Katebzadeh, P. Söderhjelm, I. Nilsson, U. Ryde, Ligand affinities predicted with  
646 the MM/PBSA method: dependence on the simulation method and the force field. *J. Med.*  
647 *Chem.* **49**, 6596-6606 (2006).
- 648 30. J. Srinivasan, T. E. Cheatham, III, T. E. Cieplak, P. Kollman, D. A. Case, Continuum solvent  
649 studies of the stability of DNA, RNA, and phosphoramidate–DNA helices. *J. Am. Chem. Soc.*  
650 **120**, 9401-9409 (1998).
- 651 31. C. R. Mehta, S. J. Pocock, Adaptive increase in sample size when interim results are  
652 promising: a practical guide with examples. *Stat Med* **30**, 3267-3284 (2011).
- 653 32. P. Broberg, Sample size re-assessment leading to a raised sample size does not inflate type I  
654 error rate under mild conditions. *BMC Med Res Methodol* **13**, 94 (2013).
- 655  
656

657 **Figures and legends**  
658

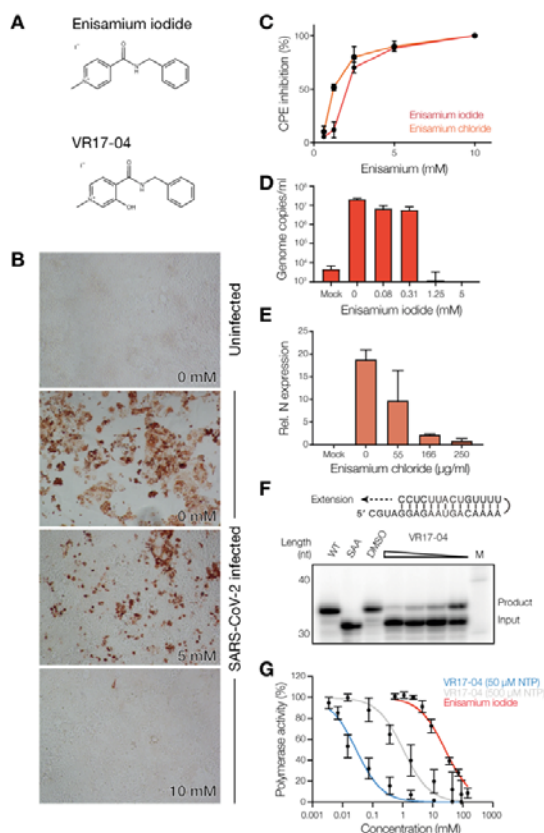

659  
660 **Figure 1. Enisamium inhibits SARS-CoV-2 infection and replication *in vitro*.** (A)  
661 Chemical structures of FAV00A and VR17-04. The chemical structure of FAV00B is  
662 identical to FAV00A except that chloride ions are present instead of iodide. (B)  
663 Inhibition of SARS-CoV-2 N expression in Caco-2 cells by enisamium chloride. (C)  
664 Inhibition of SARS-CoV-2 cytopathic effect in Caco-2 cells by enisamium iodide and  
665 chloride. (D) Quantification of SARS-CoV-2 RNA genome levels in NHBE cells  
666 infected with SARS-CoV-2 after treatment with enisamium iodide. (E) Quantification  
667 of HCoV-NL63 N mRNA levels in NHBE cells infected with HCoV-NL63 after  
668 treatment with enisamium chloride. (F) Inhibition of the SARS-CoV-2 nsp12/7/8 RNA  
669 polymerase complex by VR17-04 on a hairpin template. A mutant containing a  
670 double amino acid substitution in the nsp12 active site (SDD=>SAA) was used as  
671 negative control. DMSO was used as solvent control. (G) Quantification of SARS-  
672 CoV-2 nsp12/7/8 RNA polymerase complex inhibition by enisamium or VR17-04 on  
673 a hairpin template. For VR17-04 two nucleotide triphosphate concentrations were  
674 used. Polymerase activity was plotted against drug concentration and dose-response  
675 curves were fit to the data. Quantification is from n=3 independently prepared  
676 reactions using the same nsp12/7/8 protein preparation. Error bars represent  
677 standard deviation.



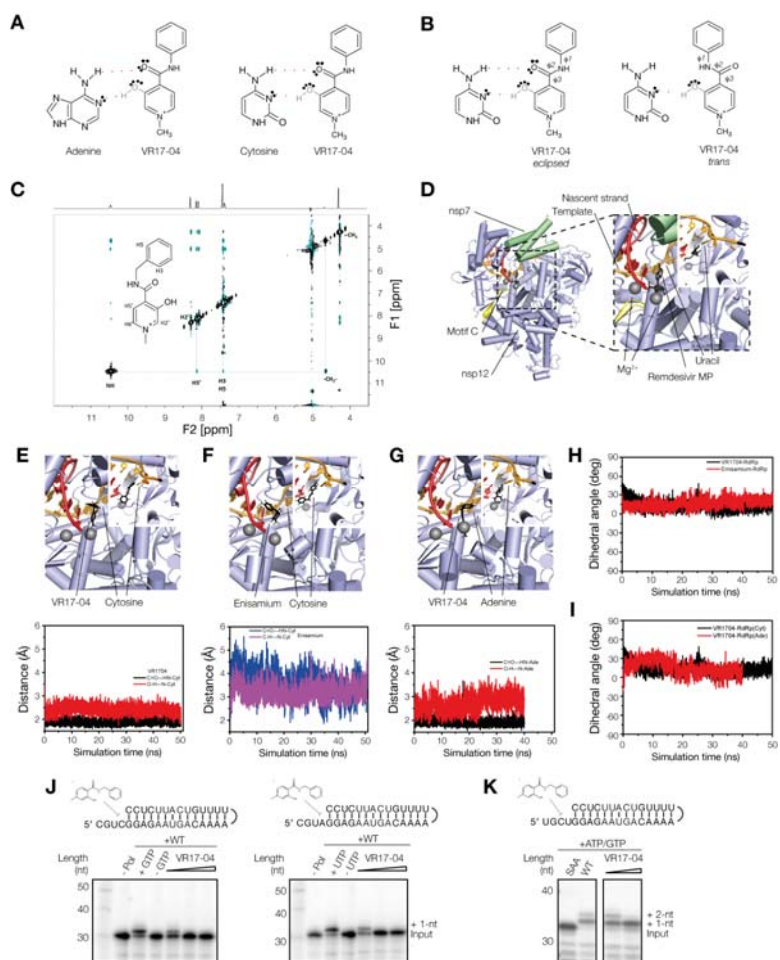

678  
679  
680  
681  
682  
683  
684  
685  
686  
687  
688  
689  
690  
691  
692  
693  
694  
695  
696  
697

**Figure 2. Enisamium metabolite VR17-04.** (A) Schematic of putative hydrogen bond formation between cytosine and adenine bases with VR17-04. (B) Schematic of the *trans* and *eclipsed* conformations of VR17-04. (C) 2D-NOESY and 1H proton (above) spectra of VR17-04 acquired at 277 K in water. The NOE correlation between the HN and H5' proton is highlighted with a dashed line. (D) Structure of the SARS-CoV-2 nsp12/7/8 complex bound to RNA and remdesivir monophosphate. Rendering based on PDB 7bv2. (E) Model (top) and MD simulation (bottom) of VR17-04 binding to cytosine in nsp12 active site. (F) Model (top) and MD simulation (bottom) of enisamium binding to cytosine in nsp12 active site. (G) Model (top) and MD simulation (bottom) of VR17-04 binding to adenine in nsp12 active site. (H) MD simulation of dihedral angle of VR17-04 or enisamium binding to cytosine in nsp12 active site. (I) MD simulation of dihedral angle of VR17-04 binding to cytosine or adenine in nsp12 active site (J) Effect of VR17-04 on SARS-CoV-2 nsp12/7/8 activity on two different hairpin templates in the presence of GTP (left) or UTP (right). In the presence of wildtype nsp12/7/8 and GTP or UTP, the radiolabelled primer was extended by 1 nt. (K) Effect of VR17-04 on SARS-CoV-2 nsp12/7/8 primer extension activity. A mutant containing a double amino acid substitution in the nsp12 active site (SDD=>SAA) was used as negative control. ATP and GTP were added to the reaction to allow extension of the template by 2 nt.



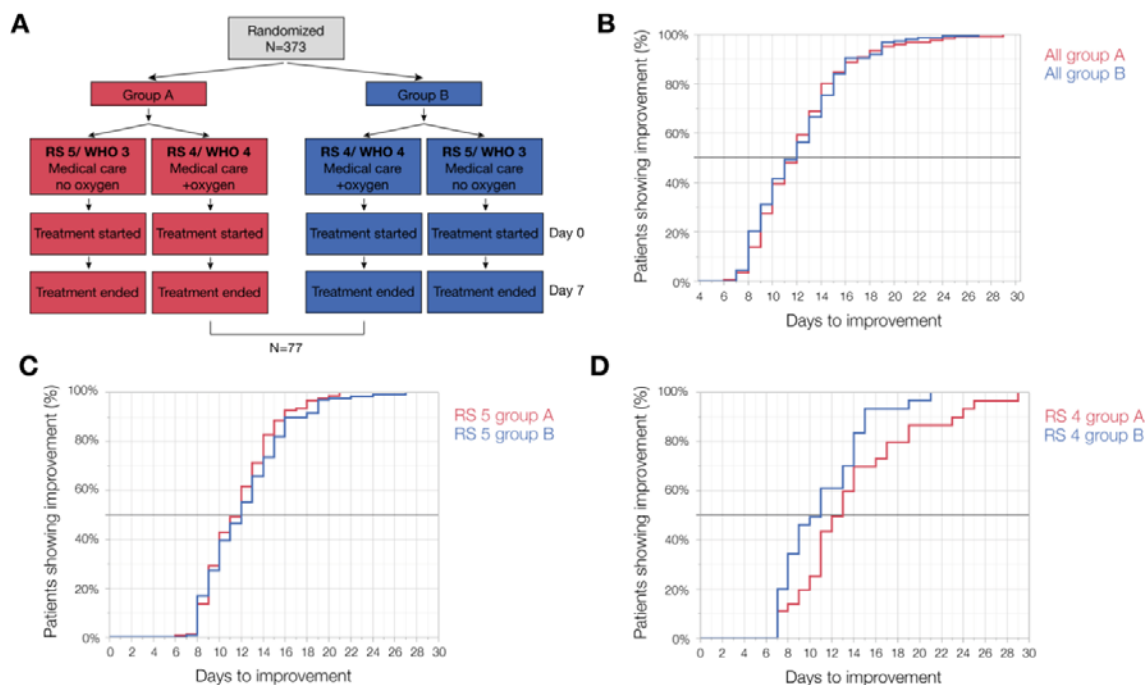

698  
699  
700  
701  
702  
703  
704

**Figure 3. Enisamium improves recovery of COVID-19 patients requiring supplementary oxygen.** (A) Schematic of patient recruitment, randomization and treatment. (B) Kaplan-Meier plot of the percentage improvement observed in all COVID-19 patients, (C) RS 5 COVID-19 patients (medical care with no oxygen support), and (D) RS 4 COVID-19 patients (medical care with non-invasive oxygen support).
